# Supplementary material
Source: Springer Nature journal article supplement (https://www.springermedizin.de/resource/supplementary/12889_2013_5527_MOESM3_ESM.pdf/9495632)
Supplement: MOESM3 [file 9495632]

# ROC Curve

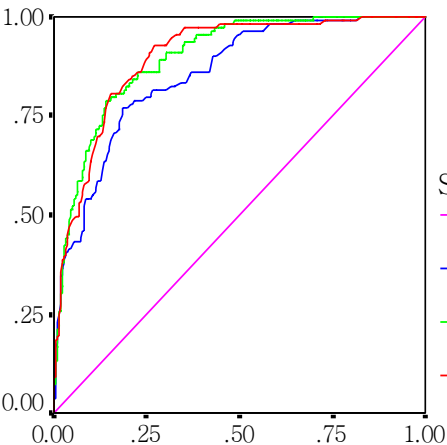

Source of the Curve

Reference Line

BF

FMI

BMI

1 - Specificity

Diagonal segments are produced by ties.
